# Supplementary material
Source: PubMed Central journal article supplement (PMC4511933)
Supplement: ismej2014262x1.pdf [file ismej2014262x1.pdf]

# Supplemental Material

## **Methanogenic Food Web in Gut Contents of the Methane-Emitting Earthworm *Eudrilus eugeniae* from Brazil**

Kristin Schulz<sup>1#</sup>, Sindy Hunger<sup>1</sup>, George G. Brown<sup>2</sup>, Siu M. Tsai<sup>3</sup>, Carlos C. Cerri<sup>3</sup>,  
Ralf Conrad<sup>4</sup>, and Harold L. Drake<sup>1\*</sup>

Department of Ecological Microbiology, University of Bayreuth, 95440 Bayreuth,  
Germany<sup>1</sup>; Embrapa Florestas, Colombo, Brazil<sup>2</sup>; CENA-USP, Center for Nuclear  
Energy in Agriculture, University of São Paulo, Brazil<sup>3</sup>; Max-Planck-Institute for  
Terrestrial Microbiology, 35043 Marburg, Germany<sup>4</sup>

#Present address: Netherlands Institute of Ecology (NIOO-KNAW), Department of  
Microbial Ecology, 6708 AB Wageningen, The Netherlands

**\*Corresponding author:** Harold L. Drake, Department of Ecological Microbiology,  
University of Bayreuth, 95440 Bayreuth, Germany. Tel: (49) (0)921-555640. Fax: (49)  
(0)921-555793. E-Mail: [HLD@uni-bayreuth.de](mailto:HLD@uni-bayreuth.de).

**Table S1.** Number of sequences, number of family-level OTUs, and coverage of bacterial 16S rRNA cDNA sequences of [<sup>13</sup>C]- and [<sup>12</sup>C]-glucose treatments.

Abbreviations: t<sub>0</sub>, sampling point at the start of incubation; t<sub>24</sub>, sampling point after 24 h of incubation; H, 'heavy' fractions; L, 'light' fractions.

| Item                | t <sub>0</sub> <sup>13</sup> C L | t <sub>0</sub> <sup>13</sup> C H | t <sub>24</sub> <sup>13</sup> C L | t <sub>24</sub> <sup>13</sup> C H | t <sub>24</sub> <sup>12</sup> C L | t <sub>24</sub> <sup>12</sup> C H | Total |
|---------------------|----------------------------------|----------------------------------|-----------------------------------|-----------------------------------|-----------------------------------|-----------------------------------|-------|
| Number of sequences | 88                               | 92                               | 81                                | 90                                | 91                                | 86                                | 528   |
| Number of OTUs      | 24                               | 28                               | 29                                | 12                                | 25                                | 23                                | 46    |
| Coverage (%)        | 85                               | 89                               | 86                                | 94                                | 90                                | 91                                | 98    |

**Table S2.** Number of sequences, number of species-level OTUs, and coverage of *mcrA* and *mrtA* sequences of [<sup>13</sup>C]- and [<sup>12</sup>C]-glucose treatments. Abbreviations: t<sub>0</sub>, sampling point at start of incubation; t<sub>24</sub>, sampling point after 24 h of incubation; H, 'heavy' fractions; L, 'light' fractions.

| Item                | t <sub>0</sub> <sup>13</sup> C L | t <sub>0</sub> <sup>13</sup> C H | t <sub>24</sub> <sup>13</sup> C L | t <sub>24</sub> <sup>13</sup> C H | t <sub>24</sub> <sup>12</sup> C L | t <sub>24</sub> <sup>12</sup> C H | Total |
|---------------------|----------------------------------|----------------------------------|-----------------------------------|-----------------------------------|-----------------------------------|-----------------------------------|-------|
| Number of sequences | 87                               | 93                               | 71                                | 96                                | 68                                | 82                                | 497   |
| Number of OTUs      | 2                                | 2                                | 5                                 | 3                                 | 5                                 | 4                                 | 14    |
| Coverage (%)        | 100                              | 100                              | 97.2                              | 100                               | 100                               | 100                               | 99.6  |

**Table S3.** Phylogenetic identity of representative bacterial 16S rRNA cDNA sequences. Abbreviations in sequence identifier code: B0, bacterial 16S rRNA cDNA sequence from sampling point  $t_0$  (i.e., at start of incubation); BE, bacterial 16S rRNA cDNA sequence from sampling point  $t_{24}$  (i.e., at 24 h of incubation); L, 'light' fractions; H, 'heavy' fractions; 13 and 12, [ $^{13}\text{C}$ ]- and [ $^{12}\text{C}$ ]-glucose treatments, respectively.

| Phylum and class (*)  | Sub-order (*), and family                         | Representative sequence <sup>1</sup> | Closest related organism or sequence <sup>1</sup>                      | Similarity (%) |
|-----------------------|---------------------------------------------------|--------------------------------------|------------------------------------------------------------------------|----------------|
| <i>Actinobacteria</i> | <i>Acidimicrobiaceae</i>                          | B013H_F03 (HG964576)                 | Uncultured actinobacterium clone SGR131 (JQ793492)                     | 97             |
|                       | <i>Unclassified Acidimicrobineae*</i>             | B013H_E02 (HG964575)                 | <i>Aciditerrimonas</i> sp. CH22-21 (JN033775)                          | 96             |
|                       | <i>Corynebacterinae* (Dietziaceae)</i>            | B013L_H07 (HG964571)                 | <i>Dietzia</i> sp. BBDP49 (DQ337508)                                   | 99             |
|                       | <i>Corynebacterinae* (Nocardiaceae)</i>           | BE12H_A06 (HG964572)                 | <i>Rhodococcus pyridinivorans</i> (AB506120)                           | 99             |
|                       | <i>Corynebacterinae* (Mycobacteriaceae)</i>       | B013H_A06 (HG964570)                 | <i>Mycobacterium moriokaense</i> CIP 105393 (AY859686)                 | 99             |
|                       | <i>Micrococchineae* (Microbacteriaceae)</i>       | BE13L_B12 (HG964569)                 | <i>Microbacterium takaoensis</i> strain MVC17 (JQ660710)               | 99             |
|                       | <i>Micrococchineae* (Micrococcaceae)</i>          | B013H_C10 (HG964568)                 | <i>Citrococcus</i> sp. SeaH-As1s (FJ607345)                            | 99             |
|                       | <i>Propionibacterinae* (Propionibacteriaceae)</i> | BE13H_D11 (HG964574)                 | <i>Propioniferax</i> sp. P7 (EU109728)                                 | 97             |
|                       | <i>Propionibacterinae* (Nocardioideaceae)</i>     | B013H_B05 (HG964573)                 | <i>Nocardioides</i> sp. Kmb27 (KF289477)                               | 98             |
|                       | <i>Coriobacteriaceae</i>                          | B013H_A05 (HG964578)                 | Uncultured <i>Coriobacteriaceae</i> bacterium clone Pad-120 (JX505367) | 96             |
|                       | <i>Rubrobacteraceae</i>                           | B013L_G11 (HG964577)                 | Uncultured <i>Rubrobacteraceae</i> bacterium clone Elev (EF019514)     | 94             |
| <i>Bacteroidetes</i>  | <i>Cytophagaceae</i>                              | BE12L_D02 (HG964579)                 | Uncultured <i>Bacteroidetes</i> bacterium clone X-12 (HQ132391)        | 91             |
|                       | <i>Porphyromonadaceae</i>                         | BE13H_G02 (HG964580)                 | <i>Dysgonomonas capnocytophagoideis</i> (AB548674)                     | 93             |
| <i>Chloroflexi</i>    | <i>Anaerolineaceae</i>                            | B013H_H11 (HG964581)                 | Uncultured <i>Chloroflexi</i> bacterium clone RLT4_45 (GU236052)       | 99             |
| <i>Firmicutes</i>     | <i>Bacillaceae</i>                                | B013H_E05 (HG964592)                 | <i>Bacillus benzoovorans</i> strain DSM5391 (D78311)                   | 99             |
|                       | <i>Bacillaceae</i>                                | BE12H_G09 (HG964593)                 | <i>Bacillus thuringiensis</i> strain Sn9 (KC683724)                    | 99             |
|                       | <i>Bacillaceae</i>                                | BE13L_A05 (HG964594)                 | <i>Bacillus</i> sp. AP8 (JX101689)                                     | 97             |
|                       | <i>Clostridiaceae 1</i>                           | B013H_A09 (HG964588)                 | <i>Clostridium paraputrificum</i> (AY442815)                           | 96             |
|                       | <i>Clostridiaceae 1</i>                           | BE12H_A02 (HG964589)                 | <i>Clostridium butyricum</i> strain IDCC 5101 (EF533982)               | 99             |
|                       | <i>Clostridiaceae 1</i>                           | BE12L_BC9 (HG964590)                 | <i>Clostridium butyricum</i> strain IDCC 5101 (EF533982)               | 98             |

Table S3. (continued)

| Phylum and class (*)  | Sub-order (*), and family             | Representative sequence | Closest related organism or sequence <sup>1</sup>                                   | Similarity (%) |
|-----------------------|---------------------------------------|-------------------------|-------------------------------------------------------------------------------------|----------------|
| <i>Firmicutes</i>     | <i>Lachnospiraceae I</i>              | BE13H_H02 (HG964586)    | <i>Clostridium propionicum</i> strain: JCM 1430 (AB649276)                          | 99             |
|                       | <i>Lachnospiraceae I</i>              | BE13H_B01 (HG964585)    | <i>Clostridium propionicum</i> strain: JCM 1430 (AB649276)                          | 97             |
|                       | <i>Lachnospiraceae I</i>              | BE13L_F11 (HG964587)    | <i>Clostridium propionicum</i> strain: JCM 1430 (AB649276)                          | 98             |
|                       | <i>Lachnospiraceae II</i>             | B013H_F04 (HG964591)    | <i>Butyrivibrio crossotus</i> strain DSM 2876 (NR_104735)                           | 92             |
|                       | <i>Lachnospiraceae III</i>            | B013H_F06 (HG964597)    | <i>Clostridium lentocellum</i> strain DSM 5427 (NR_074536)                          | 97             |
|                       | <i>Peptostreptococcaceae</i>          | B013H_A07 (HG964582)    | <i>Clostridium lituseburense</i> strain H17 (AB596881)                              | 98             |
|                       | <i>Peptostreptococcaceae</i>          | BE13H_B07 (HG964583)    | <i>Clostridium glycolicum</i> (AY007244)/<br><i>Clostridium mayombei</i> (FR733682) | 98/<br>98      |
|                       | <i>Peptostreptococcaceae</i>          | BE13H_F12 (HG964584)    | <i>Clostridium glycolicum</i> (AY007244)/<br><i>Clostridium mayombei</i> (FR733682) | 99/<br>99      |
|                       | <i>Peptococcaceae (Clostridiales)</i> | B013H_E01 (HG964600)    | Uncultured <i>Thermincola</i> sp. clone Pad-28 (JX505275)                           | 94             |
|                       | <i>Ruminococcaceae</i>                | BE13H_E07 (HG964595)    | <i>Clostridium viride</i> strain DSM 6836 (NR_026204)                               | 99             |
|                       | <i>Veillonellaceae</i>                | BE13H_G04 (HG964596)    | <i>Succinispira mobilis</i> strain 19gly1 (NR_028868)                               | 99             |
|                       | <i>Erysipelotrichaceae</i>            | B013H_D01 (HG964598)    | <i>Turicibacter sanguinis</i> strain MOL361 (NR_028816)                             | 99             |
|                       | <i>Aerococcaceae</i>                  | B013L_C05 (HG964602)    | <i>Aerococcus</i> sp. SBL (HM582941)                                                | 94             |
|                       | <i>Carnobacteriaceae</i>              | BE13L_G08 (HG964599)    | <i>Alkalibacterium</i> sp. 8B (AY554414)                                            | 96             |
|                       | <i>Planococcaceae</i>                 | B013L_H02 (HG964601)    | <i>Rummeliibacillus pycnus</i> strain Gx4 (JF833091)                                | 99             |
| <i>Fusobacteria</i>   | <i>Fusobacteriaceae</i>               | B013H_A02 (HG964603)    | <i>Fusobacterium varium</i> strain JCM 6320 (AB640694)                              | 92             |
| <i>Planctomycetes</i> | <i>Planctomycetaceae I</i>            | B013H_A08 (HG964604)    | <i>Gemmata</i> sp. CIL 30 (KC169939)                                                | 93             |
|                       | <i>Planctomycetaceae II</i>           | BE13L_B11 (HG964608)    | Uncultured planctomycete clone MLS3 (JX240766)                                      | 90             |
|                       | <i>Planctomycetaceae II</i>           | B013H_MD9 (HG964606)    | Uncultured <i>Planctomycetaceae</i> bacterium clone A09-06C (FJ542900)              | 99             |
|                       | <i>Planctomycetaceae II</i>           | B013L_A04 (HG964607)    | Uncultured planctomycete clone Kir21gry B6.c10 (HM480247)                           | 92             |
|                       | <i>Planctomycetaceae III</i>          | BE12H_BC4 (HG964605)    | Uncultured <i>Blastopirellula</i> sp. clone B05-04F (FJ543000)                      | 99             |
|                       | <i>Planctomycetaceae IV</i>           | BE12H_E08 (HG964609)    | <i>Isosphaera</i> -like str. CJuq1 (AF239699)                                       | 99             |
|                       | <i>Planctomycetaceae V</i>            | B013L_B09 (HG964610)    | Uncultured <i>Planctomyces</i> sp. clone P74 (HG917247)                             | 94             |
|                       | Novel Family                          | B013L_E07 (HG964611)    | <i>Planctomyces</i> sp. (Schlesner 668) (X81956)                                    | 85             |

Table S3. (continued)

| Phylum and class(*)           | Sub-order (*), and family | Representative sequence | Closest related organism or sequence <sup>1</sup>                                                                  | Similarity (%) |
|-------------------------------|---------------------------|-------------------------|--------------------------------------------------------------------------------------------------------------------|----------------|
| <i>Proteobacteria</i>         |                           |                         |                                                                                                                    |                |
| <i>Alpha-proteobacteria</i> * | <i>Hyphomicrobiaceae</i>  | B013H_MD10 (HG964617)   | <i>Hyphomicrobium</i> sp. NL23 (JX131369)                                                                          | 99             |
|                               | <i>Phyllobacteriaceae</i> | BE13L_B10 (HG964612)    | <i>Mesorhizobium amorphae</i> strain JN37 (KF150349)                                                               | 99             |
|                               | <i>Rhodobacteraceae</i>   | BE13L_G09 (HG964616)    | <i>Paracoccus</i> sp. PA216 (AM900779)                                                                             | 93             |
|                               | <i>Acetobacteraceae</i>   | B013H_F01 (HG964613)    | <i>Roseomonas</i> sp. BUT-5 (KF254767)                                                                             | 98             |
|                               | <i>Acetobacteraceae</i>   | BE12H_H07 (HG964614)    | <i>Roseomonas</i> sp. WW53 (KF619243)                                                                              | 94             |
|                               | <i>Rhodospirillaceae</i>  | B013H_G10 (HG964615)    | <i>Defluviicoccus vanus</i> strain Ben 114 (NR_041771)                                                             | 88             |
| <i>Beta-proteobacteria</i> *  | <i>Oxalbacteraceae</i>    | B013H_D05 (HG964618)    | <i>Herbaspirillum</i> sp. 14 (AB218285)                                                                            | 99             |
|                               | <i>Neisseriaceae</i>      | BE13L_F12 (HG964619)    | <i>Chitinilyticum aquatile</i> strain c14 (NR_043712)                                                              | 96             |
| <i>Delta-proteobacteria</i> * | Novel family              | BE12H_H10 (HG964623)    | <i>Anaeromyxobacter dehalogenans</i> strain DCP17 (EU331410)                                                       | 85             |
|                               | Novel family              | BE13L_F03 (HG964624)    | <i>Geobacter bemidjiensis</i> Bem (CP001124)                                                                       | 85             |
|                               | <i>Polyangiaceae</i>      | B013H_C07 (HG964620)    | <i>Polyangium fumosum</i> strain PI fu5 (GU207879)                                                                 | 96             |
|                               | <i>Polyangiaceae</i>      | B013L_G04 (HG964621)    | <i>Sorangineae</i> bacterium 706 (JF719608)                                                                        | 98             |
|                               | <i>Polyangiaceae</i>      | BE12H_G03 (HG964622)    | <i>Sorangium cellulosum</i> strain DSM14627 (NR_044443)/<br><i>Polyangium cellulosum</i> strain So ce26 (AF387629) | 99/<br>99      |
| <i>Gamma-proteobacteria</i> * | <i>Aeromonadaceae</i>     | B013H_A04 (HG964625)    | <i>Aeromonas trota</i> strain ATCC 49657 (X60415)                                                                  | 99             |
|                               | <i>Aeromonadaceae</i>     | B013L_A08 (HG964626)    | <i>Aeromonas veronii</i> strain M-T-TSA 37 (JQ795754)                                                              | 99             |
|                               | <i>Aeromonadaceae</i>     | BE13H_B04 (HG964627)    | <i>Aeromonas hydrophila</i> strain ANSE1 (GU296671)                                                                | 99             |
|                               | <i>Enterobacteriaceae</i> | BE12H_D10 (HG964628)    | <i>Escherichia coli</i> O145:H28 str. RM13514 (CP006027)                                                           | 99             |
|                               | <i>Enterobacteriaceae</i> | BE12L_D10 (HG964629)    | <i>Citrobacter freundii</i> strain E087 (JX267103)                                                                 | 98             |
|                               | <i>Methylococcaceae</i>   | BE13L_A11 (HG964630)    | <i>Methylobacter</i> sp. LW1 (AF150784)                                                                            | 98             |
| <i>Spirochaetes</i>           | <i>Leptospiraceae</i>     | BE12H_H09 (HG964631)    | Uncultured <i>Leptospira</i> sp. clone Pad-85 (JX505332)                                                           | 93             |
| <i>Tenericutes</i>            | <i>Mycoplasmataceae</i>   | B013H_A11 (HG964632)    | Candidatus <i>Lumbricincola</i> sp. Lt-A1 (FM165581)                                                               | 98             |
| <i>Verrucomicrobia</i>        | Novel family              | B013L_E12 (HG964633)    | <i>Verrucomicrobia</i> bacterium YJF2-48 (FJ405888)                                                                | 87             |

<sup>1</sup>Accession numbers are in parentheses.

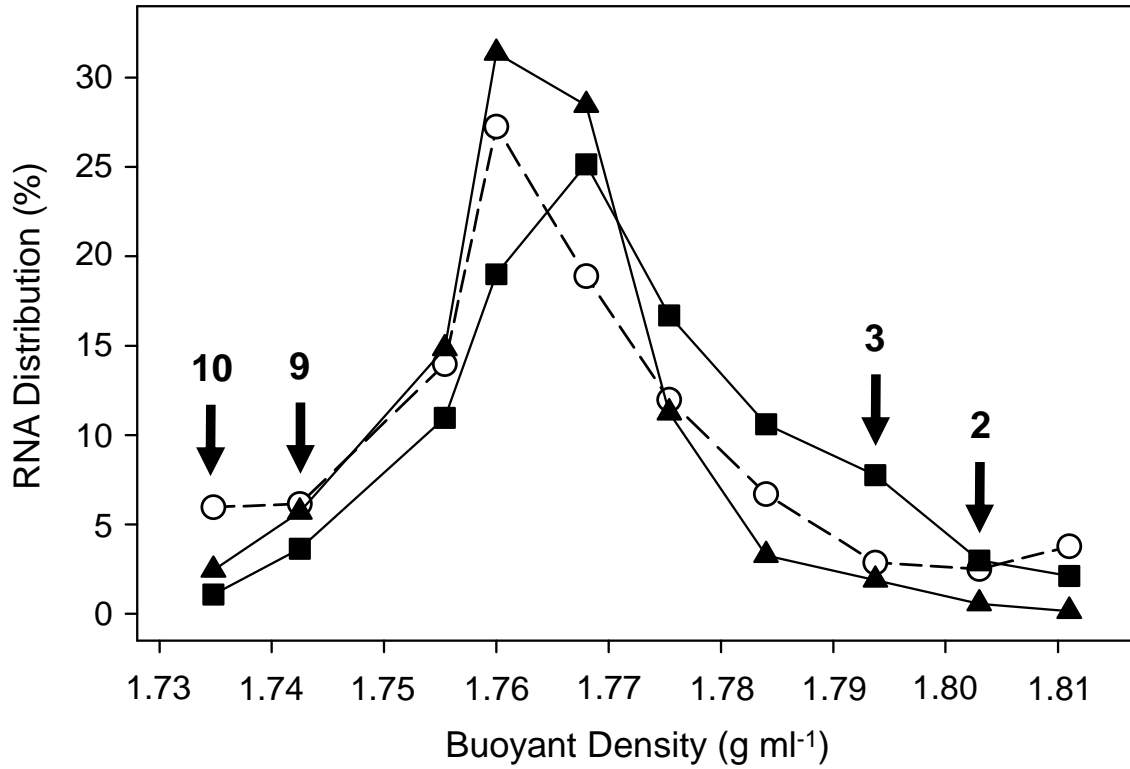

**Figure S1.** RNA distribution in gradient fractions of glucose treatments of *E. eugeniae* gut content. Arrows identify 'heavy' (2 and 3) and 'light' (9 and 10) fractions used for molecular analyses. Symbols: open circles, RNA extracted from [<sup>13</sup>C]-glucose treatments at the start of incubation; filled squares, RNA extracted from [<sup>13</sup>C]-glucose treatments after 24 hours of incubation; filled triangles, RNA extracted from [<sup>12</sup>C]-glucose treatments after 24 hours of incubation.

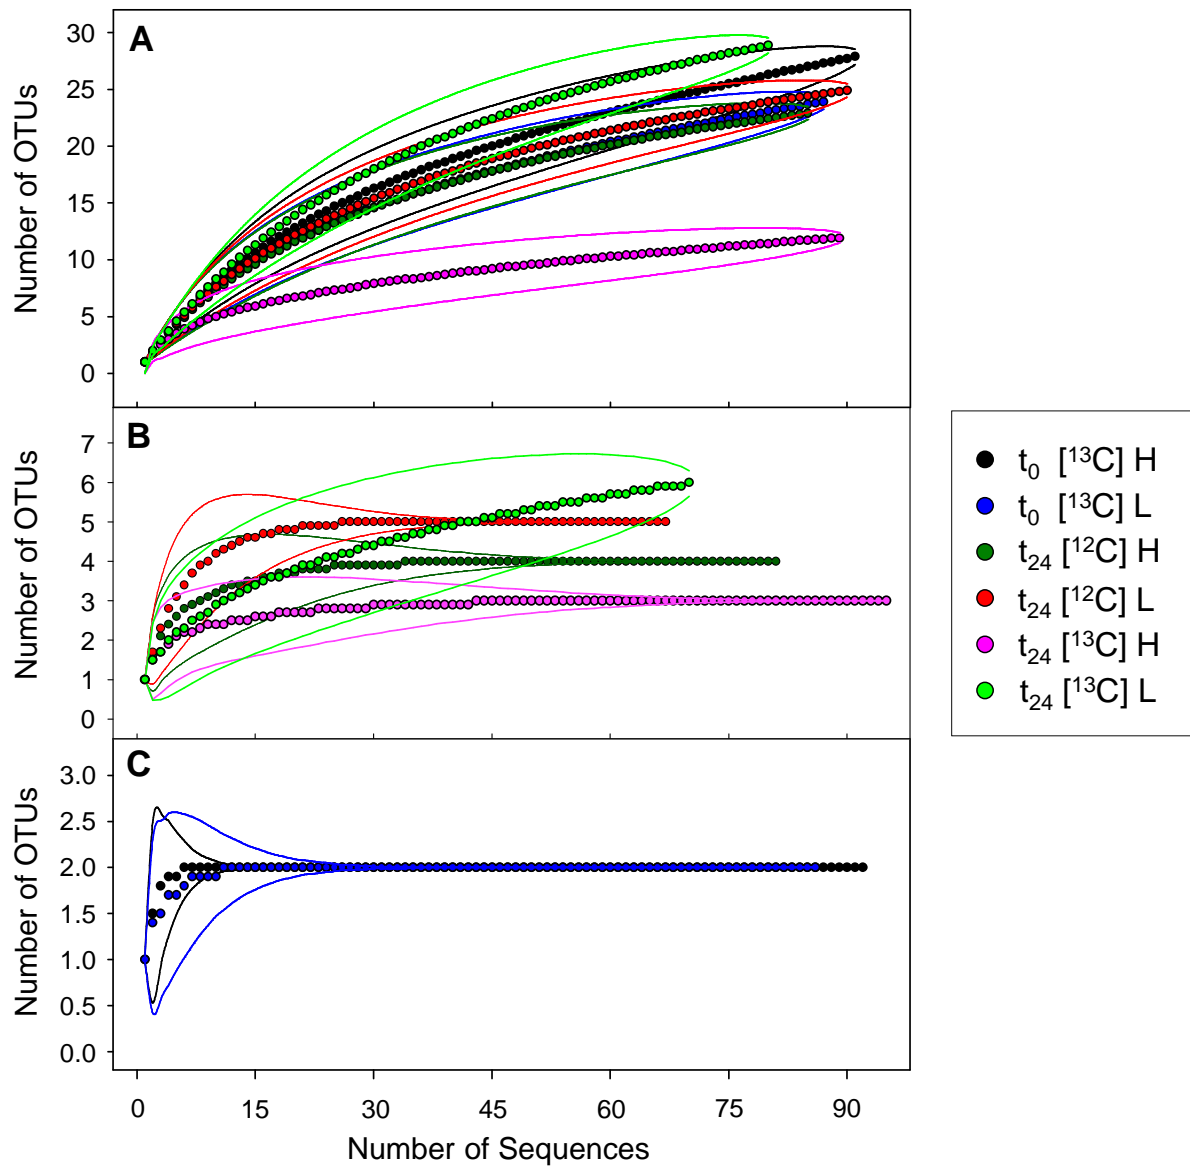

**Figure S2.** Rarefaction analysis of family level bacterial 16S rRNA cDNA sequences (A) and of species level *mcrA* and *mrtA* sequences (B [ $t_{24}$ ] and C [ $t_0$ ]) of [ $^{13}\text{C}$ ]- and [ $^{12}\text{C}$ ]-glucose treatments. Solid lines represent 95% confidence intervals. Abbreviations:  $t_0$ , sampling point at the start of incubation;  $t_{24}$ , sampling point after 24 h of incubation; H, 'heavy' fractions; L, 'light' fractions; 13 and 12, [ $^{13}\text{C}$ ]- and [ $^{12}\text{C}$ ]-glucose treatments, respectively.
